# Supplementary material for: Monitoring Cyanobacterial Blooms during the COVID-19 Pandemic in Campania, Italy: The Case of Lake Avernus
Source: MDPI journal article supplement (doi:10.3390/toxins13070471), 2021-07-08
Supplement: s1 [file s1]

# Supplementary Materials: Monitoring Cyanobacterial Blooms during the COVID-19 Pandemic in Campania, Italy: The Case of Lake Avernus

Roberta Teta, Gerardo Della Sala, Germana Esposito, Mariano Stornaiuolo, Silvia Scarpato, Marco Casazza, Aniello Anastasio, Massimiliano Lega \* and Valeria Costantino

**Table S1.** List of putatively identified metabolites by Dereplicator+ in Lake Avernus' active extract.

| Dereplicator ID                                       | Precursor Mass [M+H] <sup>+</sup> | <i>t<sub>R</sub></i> |
|-------------------------------------------------------|-----------------------------------|----------------------|
| Paulomycin_E_Paulomycin_E                             | 700.558                           | 35.46                |
| Leucomycin_V                                          | 702.398                           | 18.89                |
| Salarin_D_Salarin_D                                   | 703.299                           | 16.28                |
| 2-(Dihydroxy-isopentenyl)-2'-isopentenyl-beta-carotin | 705.579                           | 15.50                |
| 2-(Dihydroxy-isopentenyl)-2'-isopentenyl-beta-carotin | 705.58                            | 37.79                |
| Hirsutatin_A_4'-Methoxy                               | 707.347                           | 27.11                |
| Piperazimycin_A_8-Deoxy                               | 711.362                           | 21.19                |
| Aetheramide_A_Aetheramide_A                           | 719.341                           | 18.27                |
| acyldepsipeptide_1                                    | 719.342                           | 17.48                |
| 24-Nor-4(23)                                          | 721.609                           | 37.04                |
| 24-Nor-4(23)                                          | 721.646                           | 37.36                |
| Geniposidic_acid_Me_ester                             | 725.372                           | 31.61                |
| Geniposidic_acid_Me_ester                             | 729.224                           | 13.46                |
| Amidepsine_F                                          | 730.256                           | 11.45                |
| PE(O-20:0/17:2(9Z                                     | 744.584                           | 35.46                |
| Carbamidocyclophane_M                                 | 749.331                           | 20.07                |
| PE(17:2(9Z                                            | 767.399                           | 17.03                |
| Antibiotic_RF_2691B_Antibiotic_RF_2691B               | 772.393                           | 19.08                |
| 21-desethyl-21-cyclobutyl_spinosyn_D                  | 772.531                           | 31.43                |
| Cycloartane-1                                         | 773.271                           | 36.95                |
| Carbamidocyclophane_S                                 | 784.233                           | 5.20                 |
| CLWFTH                                                | 786.298                           | 12.07                |
| PG(O-20:0/18:3(9Z                                     | 787.581                           | 38.30                |
| 34-Ethylhuratoxin_5-Deoxy                             | 803.493                           | 35.08                |
| asteriidoside_H_sodium_salt                           | 803.544                           | 35.40                |
| Indicanine_D_Indicanine_D                             | 803.594                           | 39.05                |
| PE(P-20:0/22:6(4Z                                     | 804.578                           | 36.35                |
| PC(22:5(4Z                                            | 805.509                           | 35.11                |
| Anabaenopeptin_C_Anabaenopeptin_C                     | 807.522                           | 36.65                |
| Anabaenopeptin_C_Anabaenopeptin_C                     | 809.459                           | 33.87                |
| Ganosinensin_B                                        | 811.641                           | 36.73                |
| Ganosinensin_B                                        | 813.568                           | 38.61                |
| PG(O-20:0/20:4(5Z                                     | 813.597                           | 38.51                |
| PG(P-18:0/22:2(13Z                                    | 815.613                           | 38.98                |
| PG(P-18:0/22:2(13Z                                    | 815.659                           | 39.06                |
| PE(18:3(9Z                                            | 825.694                           | 38.77                |

|                                                                                               |         |       |
|-----------------------------------------------------------------------------------------------|---------|-------|
| TG(15:0/20:4(8Z                                                                               | 825.694 | 38.15 |
| TG(15:0/20:4(8Z                                                                               | 825.695 | 37.85 |
| Pteratide_III_Pteratide_III                                                                   | 827.213 | 14.26 |
| 4''-O-Carbamoyl_ansamitocinoside_P-3                                                          | 833.2   | 13.50 |
| 20:3-Glc-cholesterol_3-O-(6'-O-(11Z                                                           | 837.592 | 35.41 |
| Microsclerodermin_C_2''-Deoxy                                                                 | 850.436 | 17.89 |
| Microsclerodermin_C_2''-Deoxy                                                                 | 851.357 | 22.75 |
| Grividomycin-III                                                                              | 851.382 | 22.81 |
| pheophytin_a                                                                                  | 871.539 | 39.39 |
| pheophytin_a pheophytin-a                                                                     | 871.573 | 39.56 |
| Glycerol_1                                                                                    | 887.568 | 36.95 |
| Glycerol_1                                                                                    | 887.568 | 37.64 |
| 7-deformyl-7-hydroxymethyl-pheophytin_b/b'                                                    | 887.569 | 37.14 |
| (22S)-cholest-5-ene-1beta                                                                     | 887.57  | 36.08 |
| (22S)-cholest-5-ene-1beta                                                                     | 887.57  | 35.44 |
| TG(14:0/22:5(4Z)                                                                              | 901.726 | 37.30 |
| Cycloartane-1                                                                                 | 903.563 | 36.95 |
| Bidenphytin_B_Bidenphytin_B                                                                   | 903.564 | 35.47 |
| Bidenphytin_B_Bidenphytin_B                                                                   | 903.564 | 35.14 |
| 2-O- $\alpha$ -L-Rhamnopyranosyl-D-glucose_Hexadecyl_glycoside                                | 915.669 | 37.03 |
| TG(20:3(5Z                                                                                    | 915.705 | 37.32 |
| Somamide_B_Somamide_B                                                                         | 919.481 | 27.34 |
| Pneumocandin_A0_5-Demethyl                                                                    | 931.594 | 39.33 |
| Oleanolic_acid_bisdesmosides_3-O-[6-O-Decyl- $\beta$ -D-glucuronopyranoside]                  | 935.57  | 37.52 |
| Pregnane-3                                                                                    | 937.545 | 37.10 |
| Ossamycin_28-Methyl                                                                           | 938.541 | 39.43 |
| Didemnin_B                                                                                    | 941.697 | 28.23 |
| PI(20:1(11Z)/22:0)_1-(11Z-eicosenoyl)-2-docosanoyl-glycero-3-phospho-(1'-myo-inositol)        | 949.712 | 38.85 |
| Fucoxanthinol_3-O-(9Z-Eicosenoyl)                                                             | 951.567 | 36.01 |
| Chlorobactene_1'                                                                              | 951.727 | 39.28 |
| Chlorobactene_1'                                                                              | 951.728 | 39.83 |
| TG(16:1(9Z)/22:5(4Z)                                                                          | 955.477 | 38.65 |
| Lyngbyastatin_8_N-De-Ac                                                                       | 961.479 | 29.93 |
| 4-(2'-carboxyphenyl)-4-oxobutyryl-CoA                                                         | 967.723 | 37.87 |
| Alatogenin_3-O-[ $\alpha$ -L-Rhamnopyranosyl-(1 $\rightarrow$ 2)- $\beta$ -D-glucopyranoside] | 974.51  | 32.77 |
| 5-cis-8-cis-Tetradecadienoyl-CoA                                                              | 974.838 | 37.65 |
| Alatogenin_3-O-[ $\alpha$ -L-Rhamnopyranosyl-(1 $\rightarrow$ 2)- $\beta$ -D-glucopyranoside] | 975.553 | 25.35 |
| Megalomycin_C2                                                                                | 975.596 | 25.38 |
| Al(III)-acremonopeptide_D                                                                     | 985.732 | 37.83 |
| mixirin_B                                                                                     | 999.739 | 15.27 |
| Spirosta-5                                                                                    | 1009.5  | 25.57 |
| Spirosta-5                                                                                    | 1011.45 | 24.45 |
| Discokiolide_B_Demethoxy                                                                      | 1011.59 | 24.42 |
| [D-Asp3]-Microcystin-FR                                                                       | 1015.53 | 25.34 |
| Microsclerodermin_A_46-Deoxy                                                                  | 1015.55 | 25.41 |

|                                                                                                                                                      |         |       |
|------------------------------------------------------------------------------------------------------------------------------------------------------|---------|-------|
| Pneumocandin_A0_1"                                                                                                                                   | 1015.55 | 32.71 |
| Pneumocandin_A0_1"                                                                                                                                   | 1015.59 | 25.38 |
| 2-Amino-6-octadecene-1                                                                                                                               | 1019.75 | 38.76 |
| 2-Amino-6-octadecene-1                                                                                                                               | 1019.79 | 39.10 |
| Microcystin_Microcystin_LW                                                                                                                           | 1025.5  | 24.81 |
| Microcystin_Microcystin_LW                                                                                                                           | 1025.53 | 25.34 |
| Microcystin-M(O)R                                                                                                                                    | 1029.49 | 25.68 |
| Mixirin_C_Mixirin_C                                                                                                                                  | 1029.53 | 26.04 |
| Cilofungin                                                                                                                                           | 1030.49 | 23.64 |
| Pneumocandin_Bo                                                                                                                                      | 1037.6  | 33.14 |
| Bacillomycin_D2                                                                                                                                      | 1039.47 | 25.63 |
| TYLFTNS                                                                                                                                              | 1039.51 | 25.64 |
| WS_9326A_2"S                                                                                                                                         | 1039.56 | 25.62 |
| SJG-1                                                                                                                                                | 1044.55 | 21.79 |
| Aeruginopeptin_228B                                                                                                                                  | 1049.46 | 23.71 |
| Aeruginopeptin_228B                                                                                                                                  | 1049.51 | 25.62 |
| bacillomycin_Lc_4                                                                                                                                    | 1049.54 | 25.62 |
| Micropeptin_T1_Micropeptin_T1                                                                                                                        | 1051.51 | 23.84 |
| Pneumocandin_A0_5-Demethyl                                                                                                                           | 1053.61 | 19.83 |
| Subtulene_A_Subtulene_A                                                                                                                              | 1055.51 | 23.47 |
| Iturin_C_Iturin_C2                                                                                                                                   | 1057.72 | 35.36 |
| Iturin_C_Iturin_C2                                                                                                                                   | 1063.58 | 20.78 |
| Aquachelin-B                                                                                                                                         | 1065.49 | 24.81 |
| Pyoverdin_G4RA_4'-Amide                                                                                                                              | 1065.54 | 24.76 |
| Pneumocandin_Bo                                                                                                                                      | 1065.55 | 25.05 |
| Pneumocandin_A0_5-Demethyl                                                                                                                           | 1065.57 | 24.88 |
| Pompanopeptin_A_Pompanopeptin_A                                                                                                                      | 1069.47 | 24.49 |
| Kapakahine_C_Kapakahine_C                                                                                                                            | 1069.52 | 24.44 |
| Pompanopeptin_A_Pompanopeptin_A                                                                                                                      | 1077.84 | 39.24 |
| Micropeptin_88B_Micropeptin_88B                                                                                                                      | 1079.52 | 25.68 |
| KYNPCSNYL                                                                                                                                            | 1081.47 | 24.45 |
| KYNPCSNYL                                                                                                                                            | 1083.54 | 25.28 |
| hymenamide_J                                                                                                                                         | 1085.5  | 24.43 |
| Prenylagaramide_A_Prenylagaramide_A                                                                                                                  | 1087.58 | 33.15 |
| KYNPCSNYL                                                                                                                                            | 1093.59 | 25.28 |
| GlcNalpha1-6Ins-1-P-Cer(t18:0/26:0)_N-(hexacosanoyl)-4R-hydroxysphinganine-1-phospho-(1'-[2-amino-2-deoxy-D-glucopyranosyl-alpha1-6-D-myo-inositol]) | 1099.8  | 37.87 |
| hymenamide_J                                                                                                                                         | 1101.75 | 35.35 |
| Tripropeptin_Tripropeptin_Z                                                                                                                          | 1103.86 | 38.87 |
| Tripropeptin_Tripropeptin_Z                                                                                                                          | 1112.54 | 28.25 |
| Didemnin_B_Stereoisomer(?)                                                                                                                           | 1112.62 | 28.19 |
| Didemnin_B                                                                                                                                           | 1112.66 | 28.23 |
| Massetolides_Massetolide_E                                                                                                                           | 1112.71 | 28.25 |
| Glycerol_1                                                                                                                                           | 1117.59 | 32.75 |
| Pyoverdin_PL8_Pyoverdin_PL8                                                                                                                          | 1127.77 | 35.55 |
| Plusbacin_A_10-Deoxy                                                                                                                                 | 1128.61 | 23.99 |
| Didemnin_B_Stereoisomer(?)                                                                                                                           | 1129.78 | 36.35 |
| Tripropeptin_Tripropeptin_B                                                                                                                          | 1140.61 | 26.98 |

|                                                                                                                                                                                     |         |       |
|-------------------------------------------------------------------------------------------------------------------------------------------------------------------------------------|---------|-------|
| Plusbacin_A_10-Deoxy                                                                                                                                                                | 1151.85 | 39.19 |
| Tripropeptin_Tripropeptin_B                                                                                                                                                         | 1156.61 | 26.89 |
| Neopeptin_Neopeptin_C                                                                                                                                                               | 1173.81 | 36.36 |
| VQVEYKGETK                                                                                                                                                                          | 1179.54 | 33.22 |
| VQVEYKGETK                                                                                                                                                                          | 1180.66 | 31.68 |
| Linearmycin_C                                                                                                                                                                       | 1180.71 | 31.66 |
| N/A                                                                                                                                                                                 | 1180.77 | 31.66 |
| Leucinostatin_B2                                                                                                                                                                    | 1186.8  | 36.11 |
| Sandramycin_Dideoxy                                                                                                                                                                 | 1189.58 | 33.15 |
| Polymyxin_E                                                                                                                                                                         | 1199.68 | 37.83 |
| Leucinostatin_B2                                                                                                                                                                    | 1200.19 | 31.66 |
| M(IP)2C(t18:0/16:0)_N-(hexadecanoyl)-4R-hydroxysphinganine-1-O-[myo-inositol-1-phosphoryl-6-D-mannopyranosyl-alpha1-2-myoinositol-1-phosphate]                                      | 1202.64 | 31.69 |
| HPG-8                                                                                                                                                                               | 1202.7  | 31.66 |
| Antibiotic_GE_2270_8                                                                                                                                                                | 1287.16 | 28.28 |
| Antibiotic_GE_2270_8                                                                                                                                                                | 1298.39 | 15.46 |
| 3-Hydroxyspirostan-12-one_3-O-[α-L-Rhamnopyranosyl-(1→3)-β-D-xylopyranosyl-(1→2)-[β-D-xylopyranosyl-(1→3)-β-D-glucopyranosyl-(1→3)]-β-D-glucopyranosyl-(1→4)-β-D-galactopyranoside] | 1327.57 | 35.82 |
| GM-I                                                                                                                                                                                | 1423.59 | 13.34 |

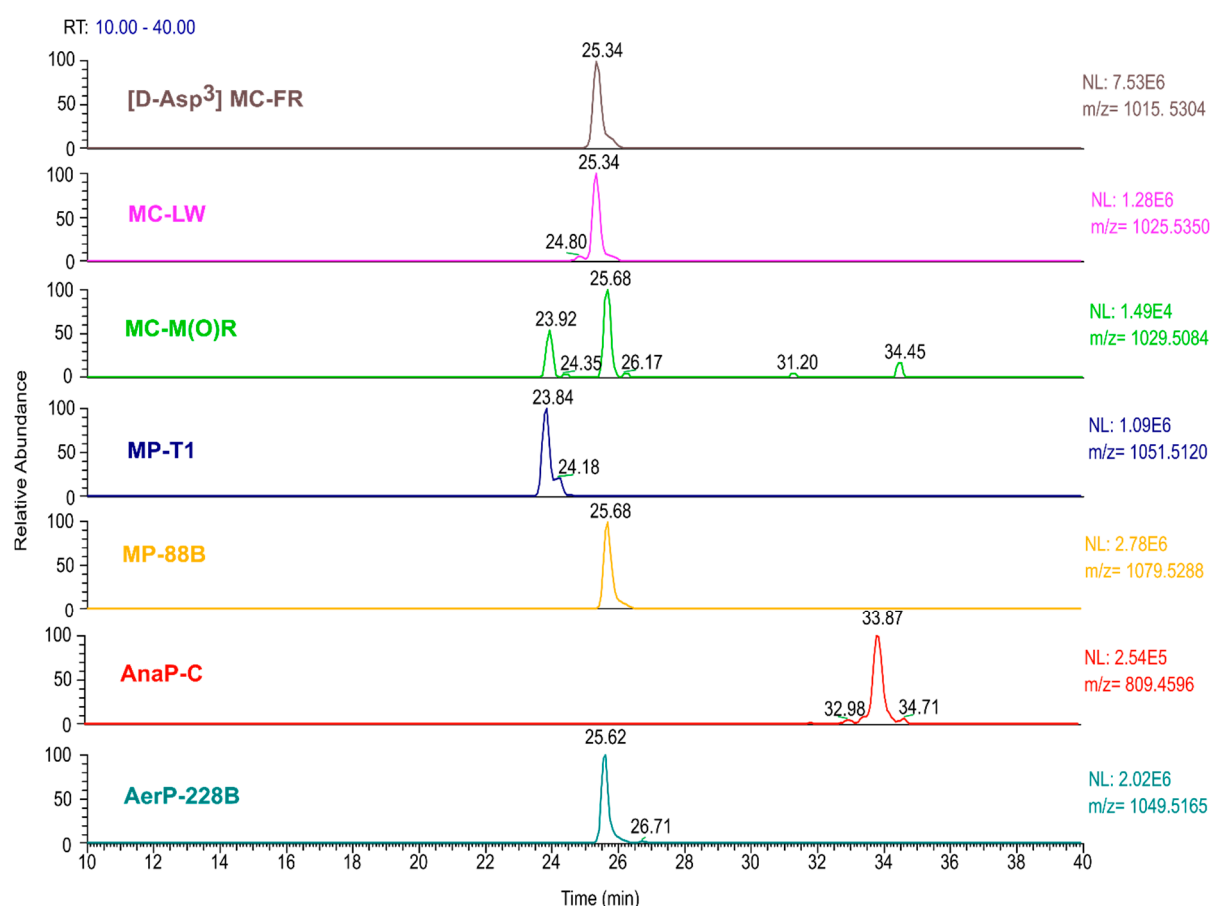

**Figure S1.** Extracted ion chromatograms of the putatively identified peptide cyanotoxins at  $m/z$  1015.5304 ([D-Asp<sup>3</sup>] MC-FR),  $m/z$  1025.5350 (MC-LW),  $m/z$  1029.5084 (MC-M(O)R),  $m/z$  1051.5120 (MP-T1),  $m/z$  1079.5288 (MP-88B),  $m/z$  809.4596 (AnaP-C),  $m/z$  1049.5165 (AerP-228B).

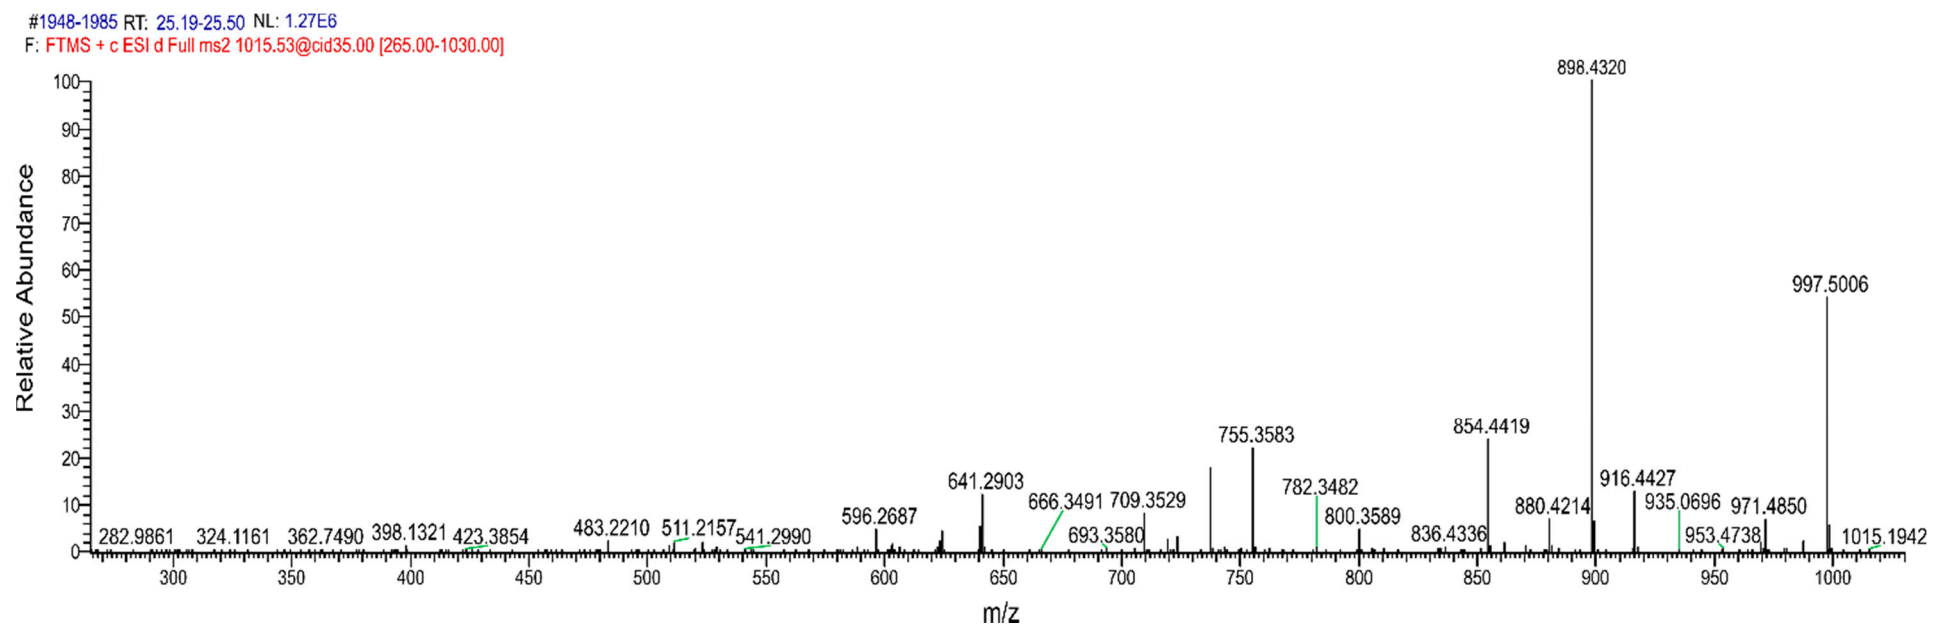

**Figure S2.** High resolution MS/MS spectrum of the  $[M+H]^+$  ion at  $m/z$  1015.5304, putatively identified as  $[D\text{-Asp}^3]$  MC-FR.

#1912-1936 RT: 24.75-24.96 NL: 6.04E5  
F: FTMS + c ESI d Full ms2 1025.53@cid35.00 [270.00-1040.00]

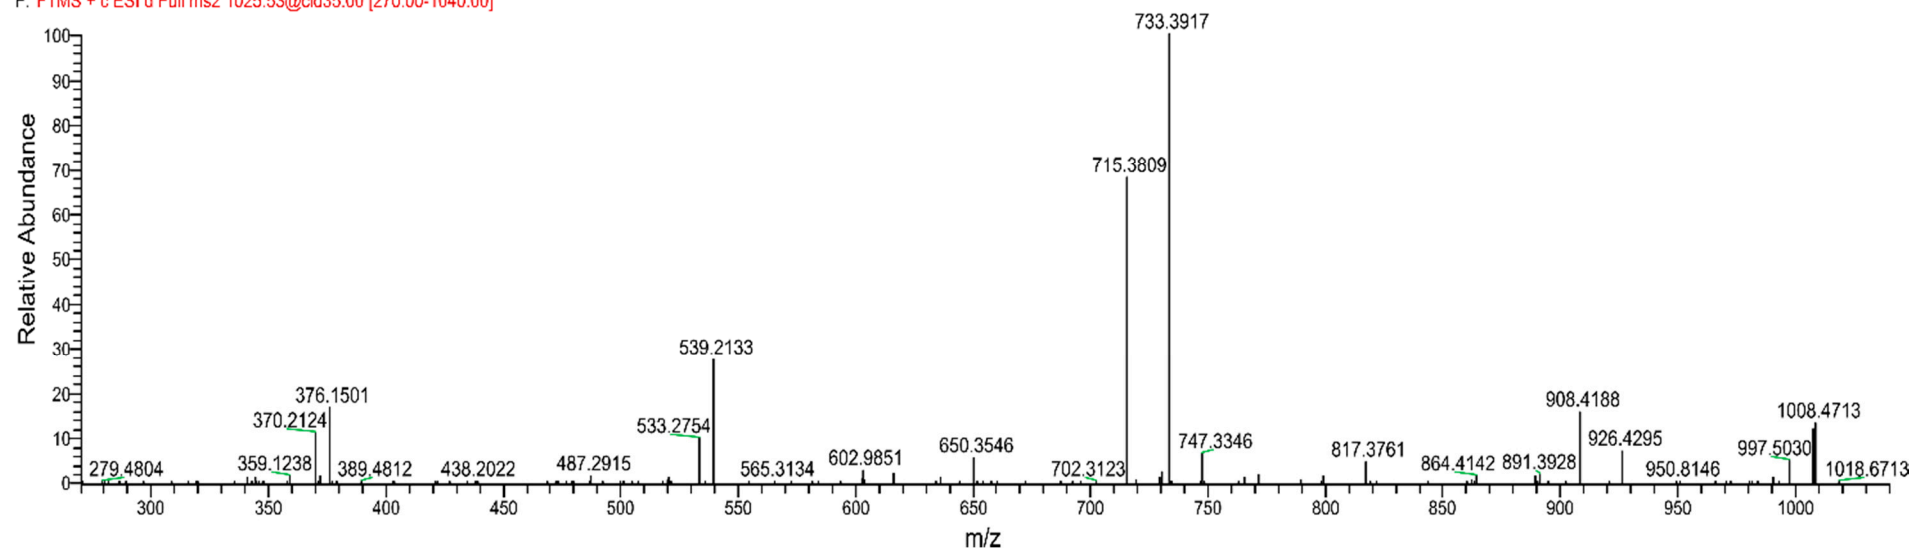

Figure S3. High resolution MS/MS spectrum of the  $[M+H]^+$  ion at  $m/z$  1025.5350, putatively identified as MC-LW.

#1713-1850 RT: 24.61-26.19 NL: 2.92E4  
F: FTMS + c ESI d Full ms2 1029.49@cid35.00 [270.00-1040.00]

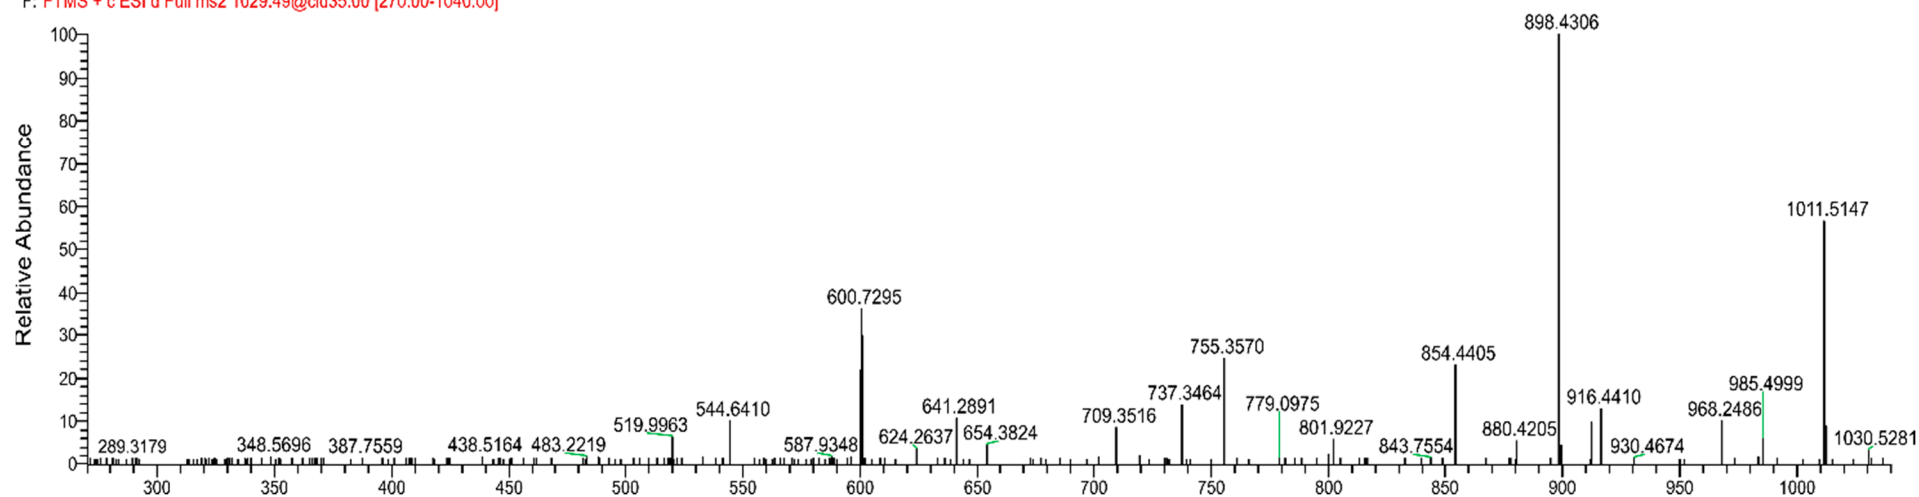

Figure S4. High resolution MS/MS spectrum of the  $[M+H]^+$  ion at  $m/z$  1029.5084, putatively identified as MC-M(O)R.

#1791-1874 RT: 23.35-24.28 NL: 1.03E5  
F: FTMS + c ESI d Full ms2 1051.51@cid35.00 [275.00-1065.00]

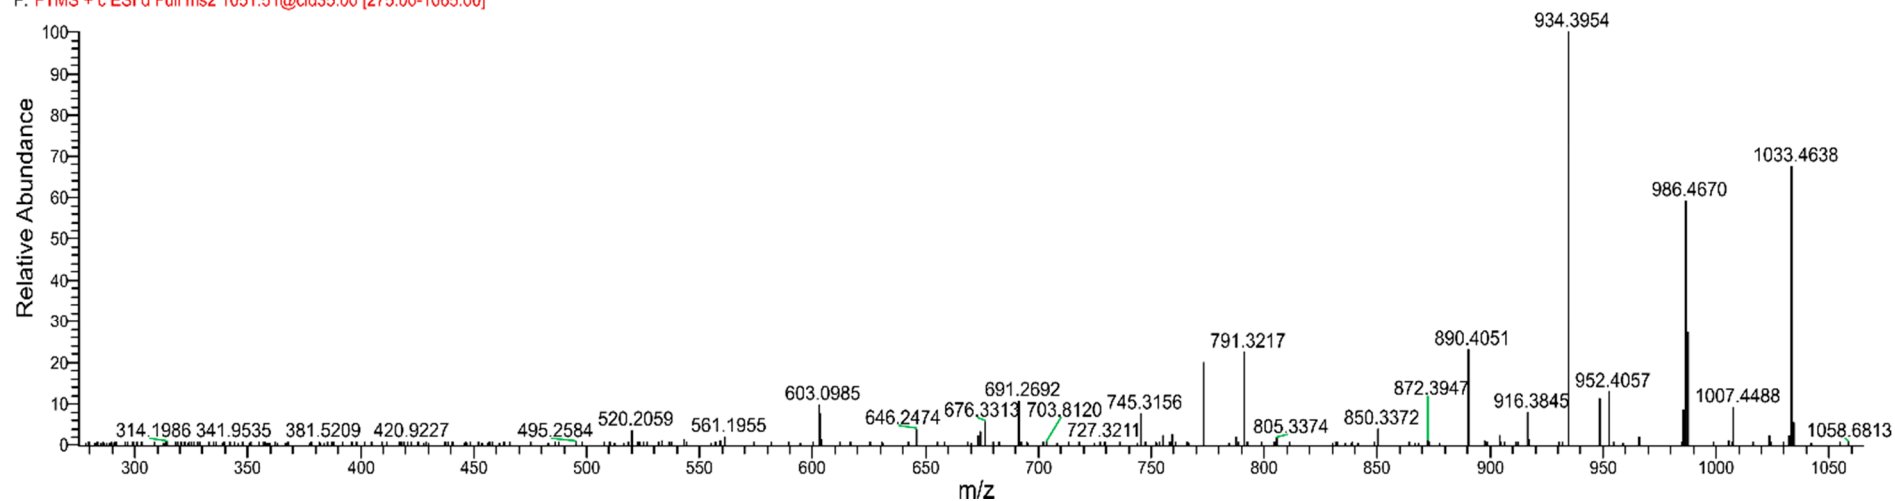

Figure S5. High resolution MS/MS spectrum of the  $[M+H]^+$  ion at  $m/z$  1051.5120, putatively identified as MP-T1.

#2914-2953 RT: 25.57-25.76 NL: 4.51E5  
F: FTMS + c ESI d Full ms2 1079.52@cid35.00 [285.00-1090.00]

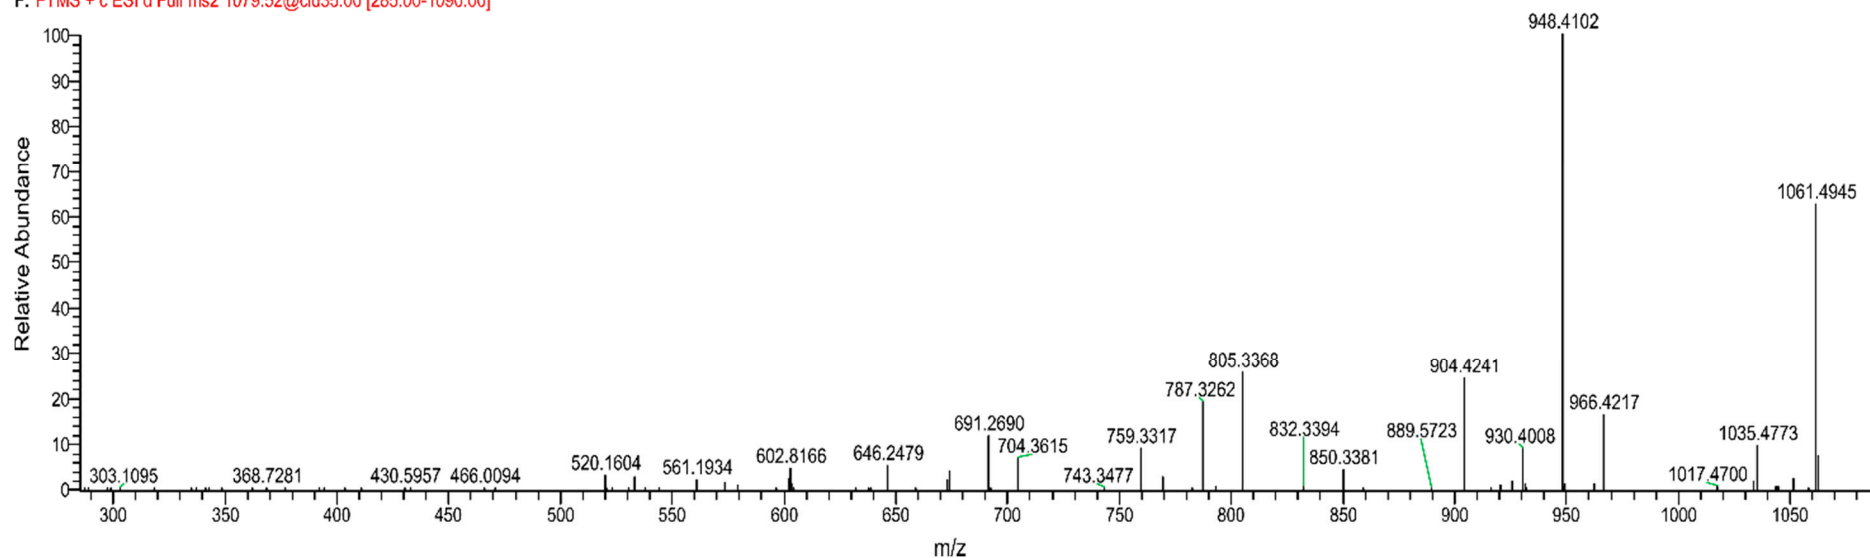

Figure S6. High resolution MS/MS spectrum of the  $[M+H]^+$  ion at  $m/z$  1079.5288, putatively identified as MP-88B.

#3886-3988 RT: 33.36-33.87 NL: 6.22E4  
F: FTMS + c ESI d Full ms2 809.45@cid35.00 [210.00-820.00]

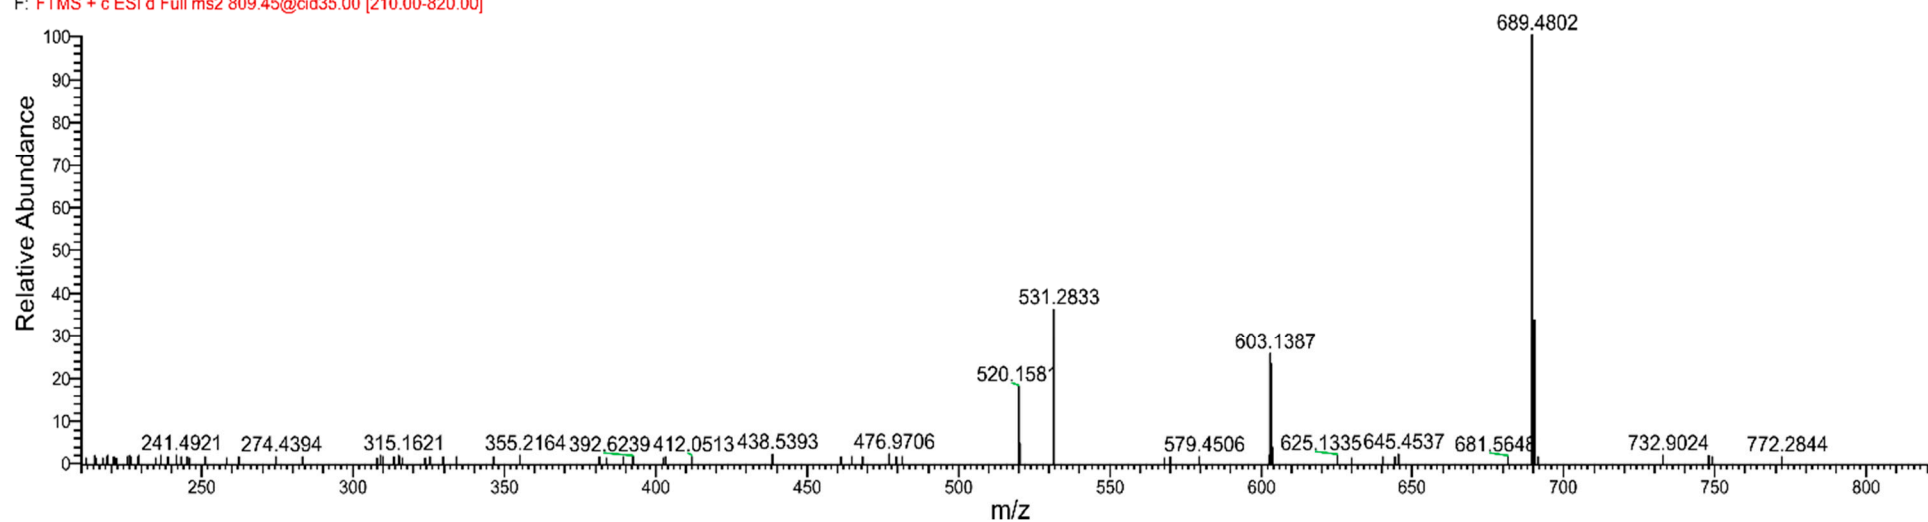

**Figure S7.** High resolution MS/MS spectrum of the  $[M+H]^+$  ion at  $m/z$  809.4596, putatively identified as AnaP-C.



#2858-2962 RT: 25.54-25.87 NL: 2.23E5

F: FTMS + c ESI d Full ms2 1049.51@cid35.00 [275.00-1060.00]

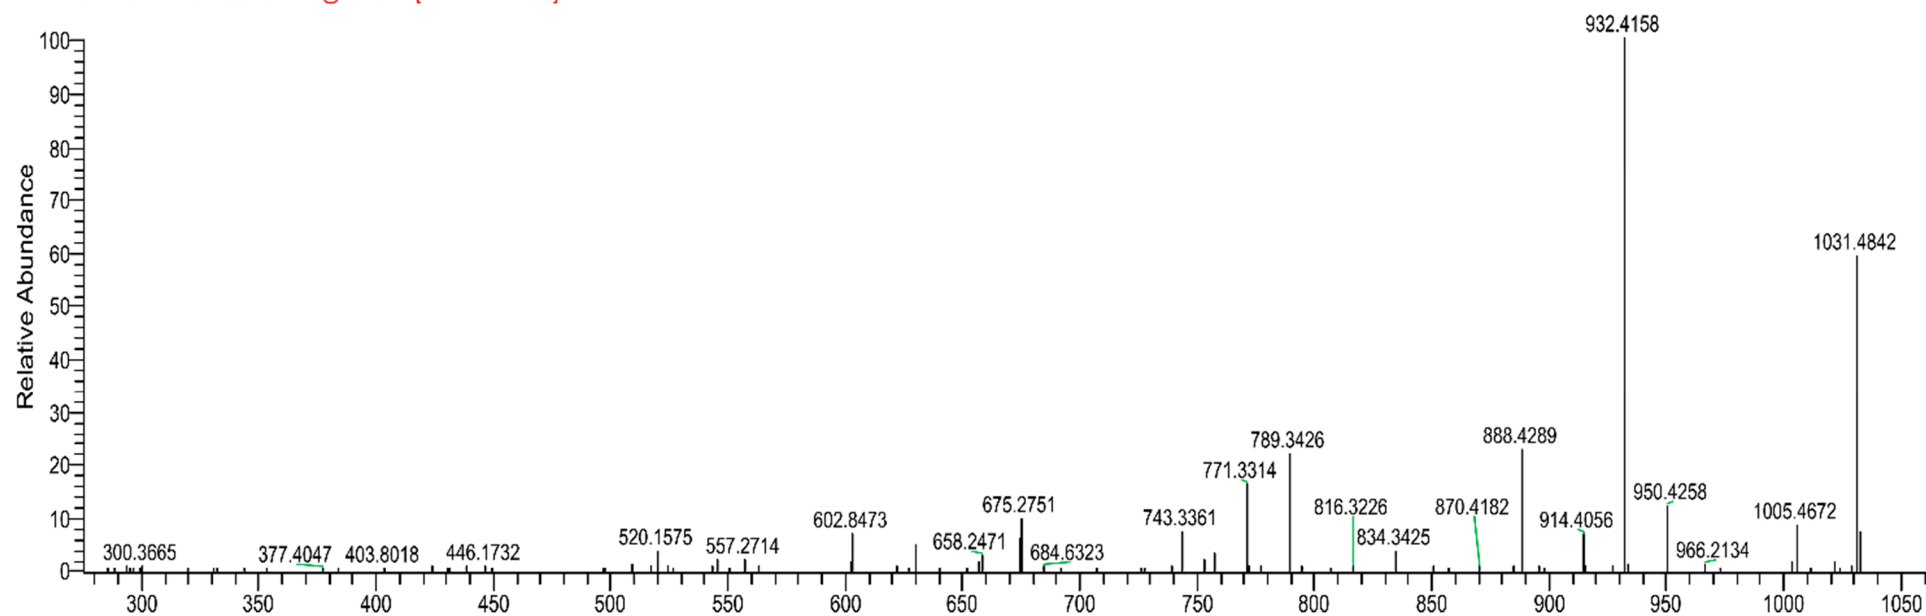

**Figure S8.** High resolution MS/MS spectrum of the  $[M+H]^+$  ion at  $m/z$  1049.5165, putatively identified as AerP-228B.
